# Supplementary material
Source: Springer Nature journal article supplement (https://www.springermedizin.de/resource/supplementary/12875_2012_898_MOESM1_ESM.pdf/9435736)
Supplement: MOESM1 [file 9435736]

## Enrolment

126 GPs

## Allocation

Intervention group  
n = 62 GPs  
(Eindhoven, Rotterdam)

Control Group  
n = 64 GPs  
(Amsterdam)

## Baseline

60 videos from 62 GPs;  
2 videos missing

64 videos from 64 GPs

## Intervention; see Tables 1 and 2

Pall Peer Group Course  
with ACA training

Usual Pall Peer Group  
Course

## Follow-up, at 12 months

55 videos from 62 GPs;  
- 3 GPs did not want to participate in the post-measurement;  
- 2 GPs were absent (one of them was ill);  
- 2 GPs discontinued the Peer Group Course

60 videos from 64 GPs;  
- 3 GPs were absent (one of them was ill);  
- 1 GP discontinued the Peer Group Course
